# Supplementary material for: Whole transcriptome analysis of the silicon response of the diatom Thalassiosira pseudonana
Source: PubMed Central journal article supplement (PMC3478156; doi:10.1186/1471-2164-13-499), 2012-09-20
Supplement: 1471-2164-13-499-S5.pdf [file 1471-2164-13-499-S5.pdf]

## Additional File 4

*T. pseudonana* (485)

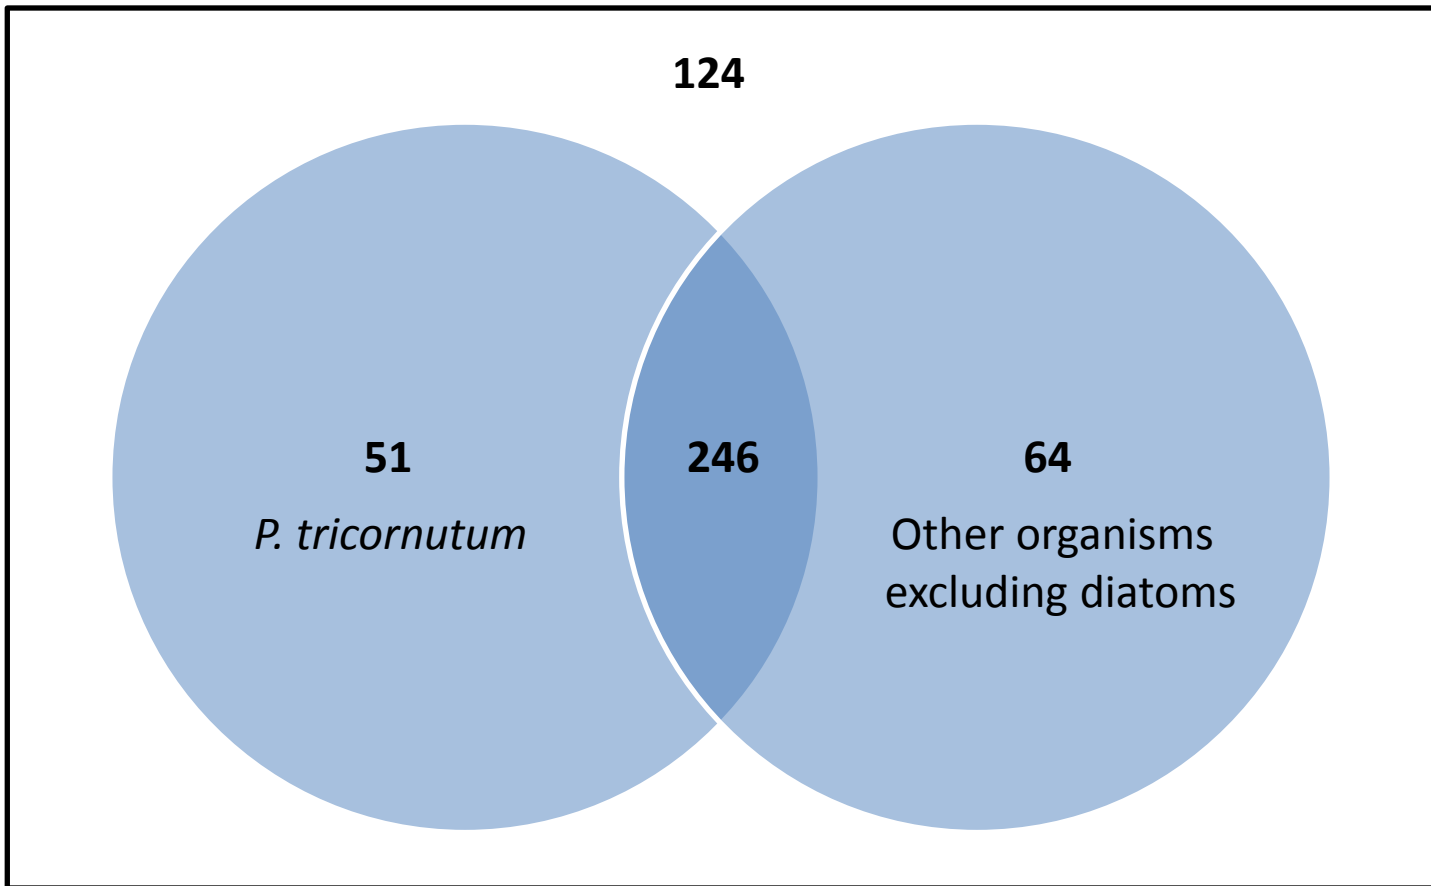

Figure S4. Venn diagram of 485 genes (SLRG) showing 175 genes were specific to diatoms, among which 124 genes were so far found only in *T. pseudonana*. Based on NCBI blast analysis. E-value cutoff 1E-10.
