# Supplementary material for: Whole transcriptome analysis of the silicon response of the diatom Thalassiosira pseudonana
Source: PubMed Central journal article supplement (PMC3478156; doi:10.1186/1471-2164-13-499), 2012-09-20
Supplement: 1471-2164-13-499-S6.pdf [file 1471-2164-13-499-S6.pdf]

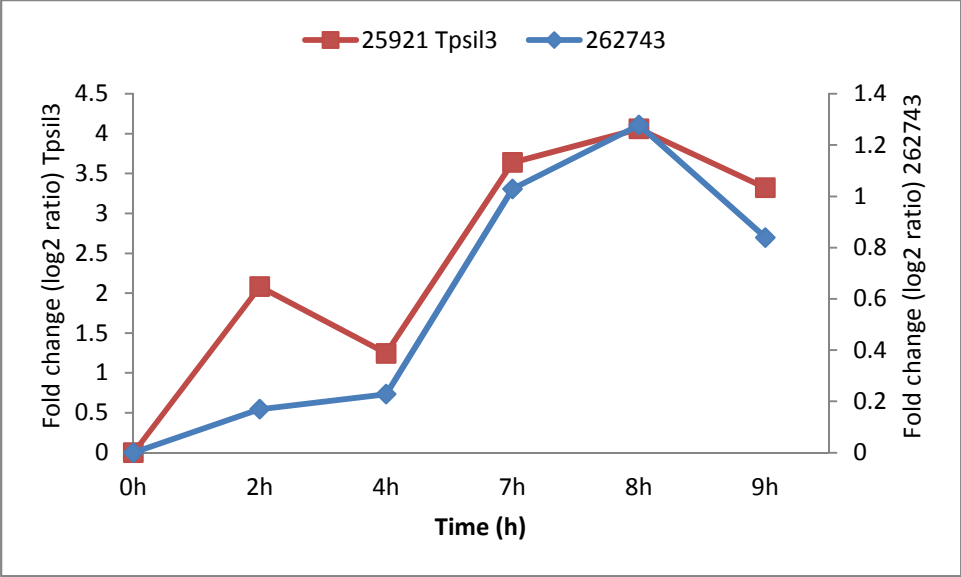

**Additional File 5**

**Figure S5** Choline transporter-like protein Thaps3\_262743 and Tpsil3 have similar expression pattern during silica replete cell cycle.
