# Supplementary material for: Whole transcriptome analysis of the silicon response of the diatom Thalassiosira pseudonana
Source: PubMed Central journal article supplement (PMC3478156; doi:10.1186/1471-2164-13-499), 2012-09-20

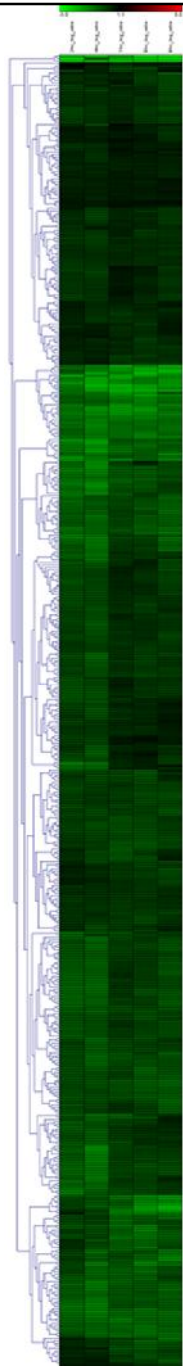

## Additional File 8

**Figure S6 Hierarchical clustered expression profile of 533 silicon starvation responsive genes (SSRG).** Columns correspond to log<sub>2</sub>ratio (fold change) of the time points (2,4,7,8 and 9 h) relative to 0h of synchronized cell culture. The intensities of the colors indicate the magnitude of upregulation (red) and down regulation (green). Black indicates no change.

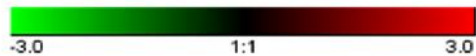

Supplement: 1471-2164-13-499-S9.pdf [file 1471-2164-13-499-S9.pdf]
