# Supplementary material for: Whole transcriptome analysis of the silicon response of the diatom Thalassiosira pseudonana
Source: PubMed Central journal article supplement (PMC3478156; doi:10.1186/1471-2164-13-499), 2012-09-20

Figure S8. Thaps3\_21968 Domain alignment

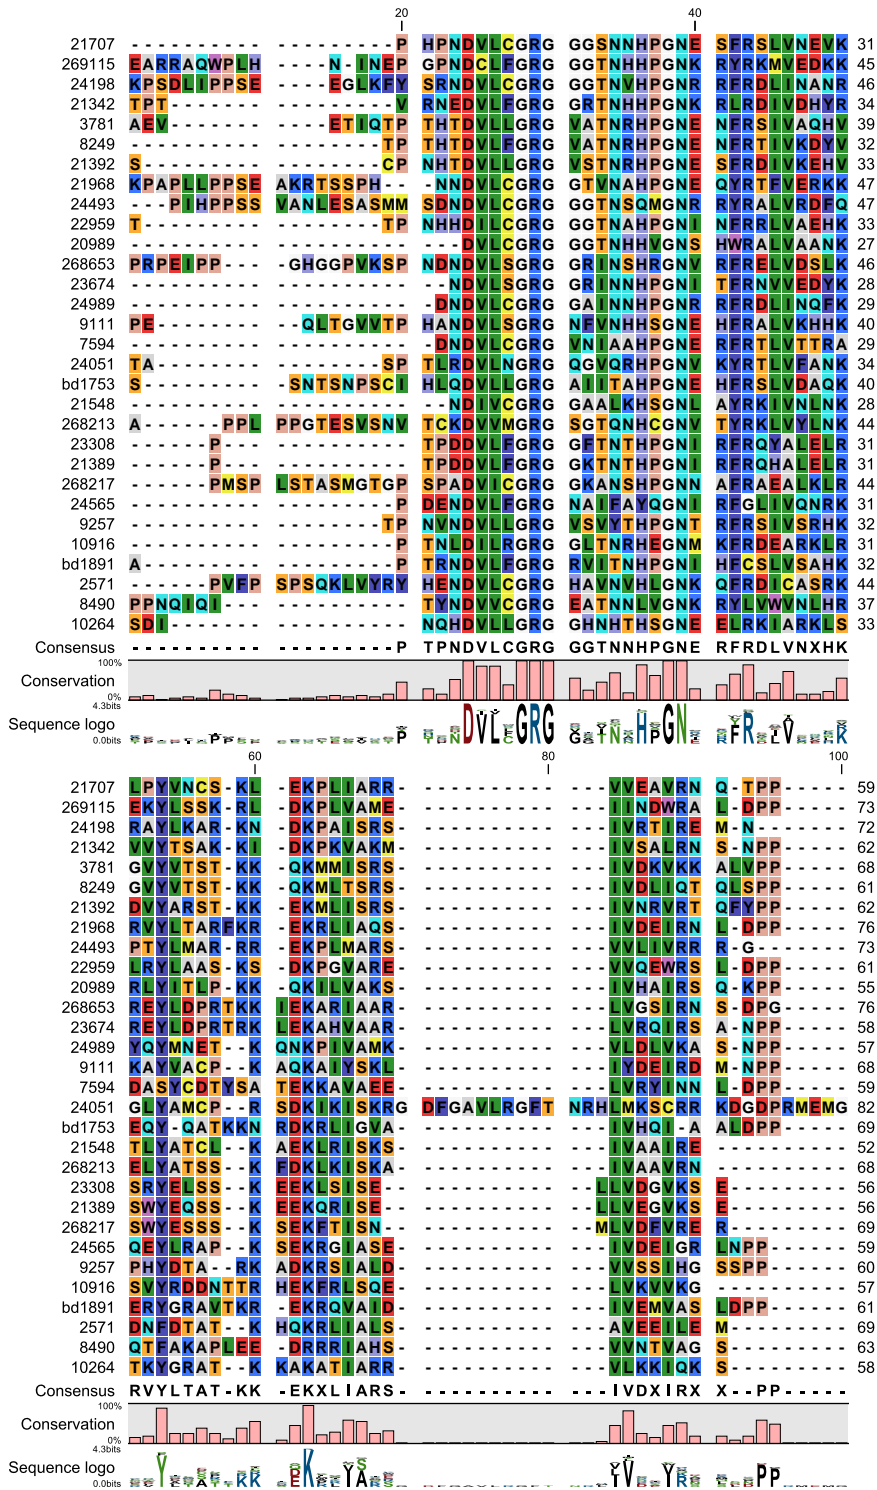

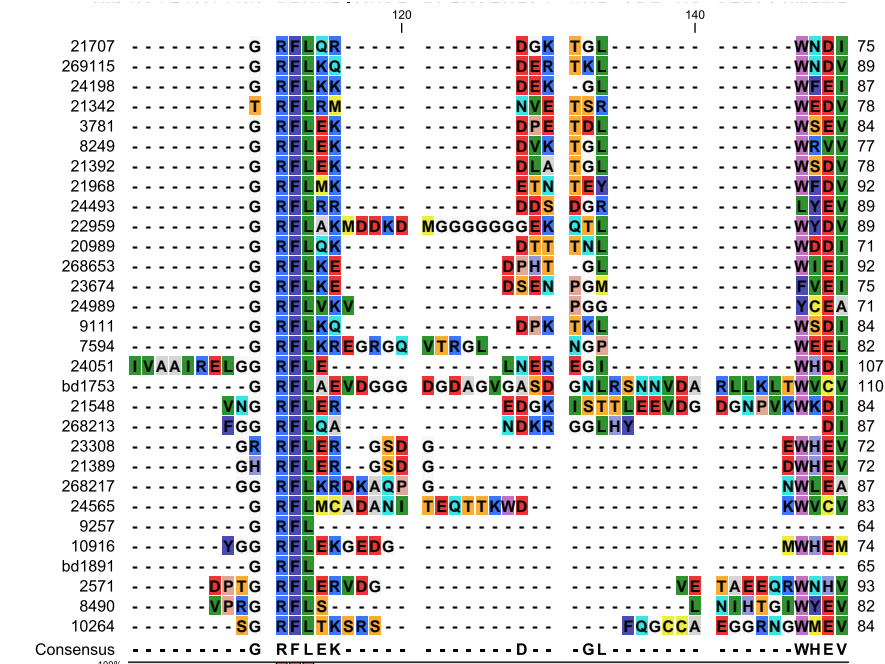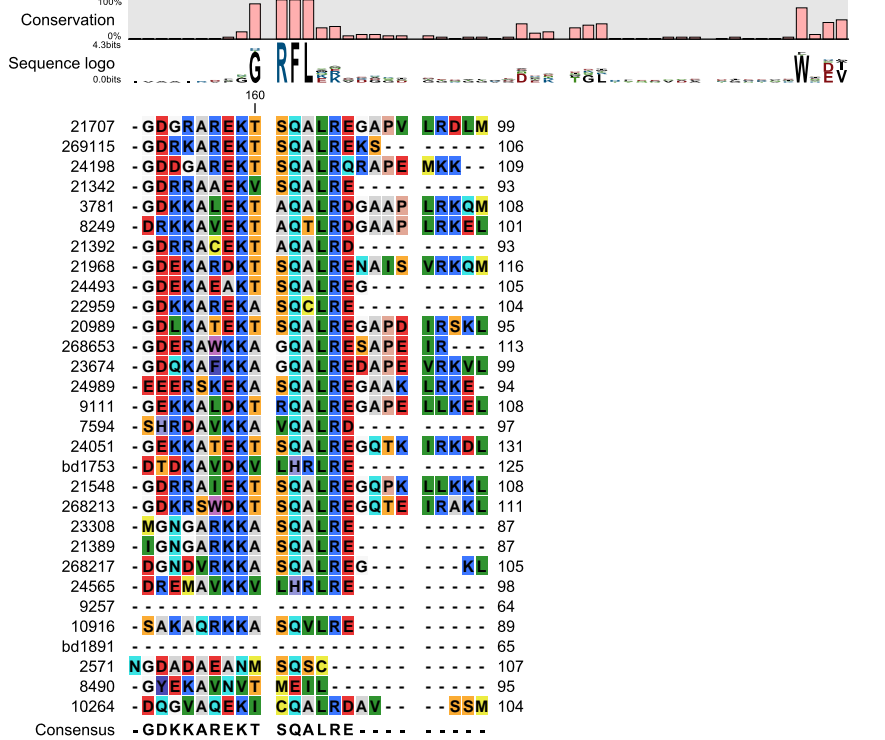

Supplement: 1471-2164-13-499-S12.pdf [file 1471-2164-13-499-S12.pdf]
